# Supplementary material for: Isotope-edited FTIR reveals distinct aggregation and structural behaviors of unmodified and pyroglutamylated amyloid β peptides
Source: Royal Society of Chemistry journal article supplement (doi:10.1039/c5cp03343h), 2015-01-01
Supplement: c5cp03343h1.pdf [file c5cp03343h1.pdf]

## Electronic Supplementary Information

### Isotope-edited FTIR reveals distinct aggregation and structural behaviors of unmodified and pyroglutamylated amyloid $\beta$ peptides

Greg Goldblatt<sup>a</sup>, Jason O. Matos<sup>b</sup>, Jeremy Gornto<sup>c</sup> and Suren A. Tatulia<sup>\*d</sup>

<sup>a</sup>Biomedical Sciences Graduate Program, University of Central Florida, Orlando, FL, USA, <sup>b</sup>Biotechnology Graduate Program, University of Central Florida, Orlando, FL, USA (currently at Graduate Program in Biochemistry and Biophysics, Brandeis University, Waltham, MA, USA), <sup>c</sup>Undergraduate student, University of Central Florida, Orlando, FL, USA (currently at Pharmacy PhD Program, Ohio State University, Columbus, OH, USA), <sup>d</sup>Department of Physics, University of Central Florida, Orlando, FL, USA.

\*Corresponding author: Tel.: 407-823-6941; Fax: 407-823-5112; E-mail: [statulia@ucf.edu](mailto:statulia@ucf.edu)

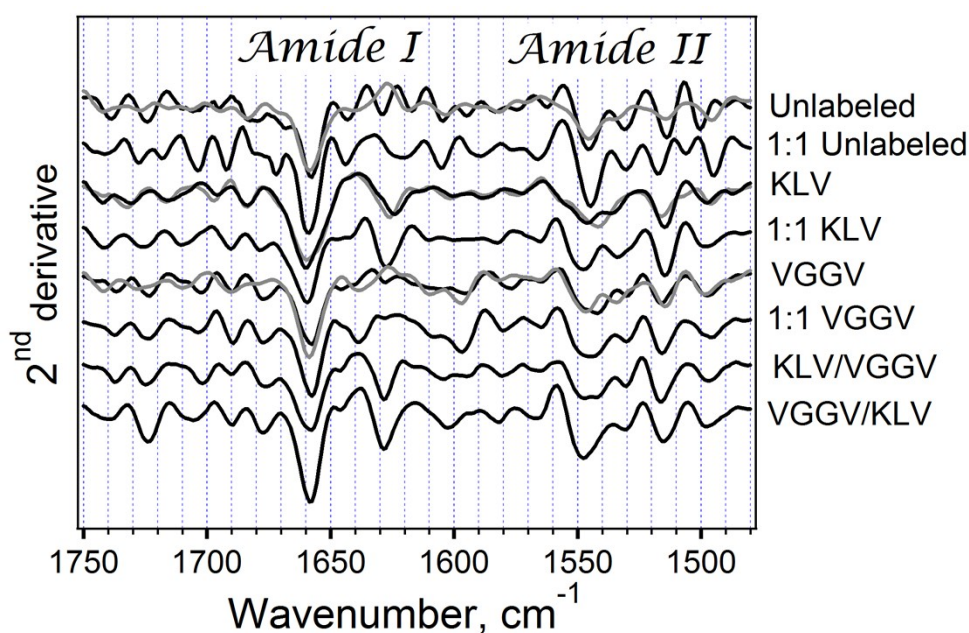

Figure S1. Second derivatives of the FTIR spectra of dry peptides in amide I and amide II regions, shown in Figure 2 of main text. Spectra for unlabeled and isotopically labeled  $A\beta_{1-42}$  and  $A\beta_{pE_{3-42}}$  peptides and their 1:1 combinations are presented. Gray lines correspond to  $A\beta_{pE_{3-42}}$ , and solid lines correspond either to  $A\beta_{1-42}$  or to combined samples, as indicated. KLV or VGGV imply the peptides have been labeled at  $K^{16}L^{17}V^{18}$  or  $V^{36}G^{37}G^{38}V^{39}$ , respectively. In KLV/VGGV or VGGV/KLV samples, the first stretch applies to  $A\beta_{1-42}$  and the second to  $A\beta_{pE_{3-42}}$ .

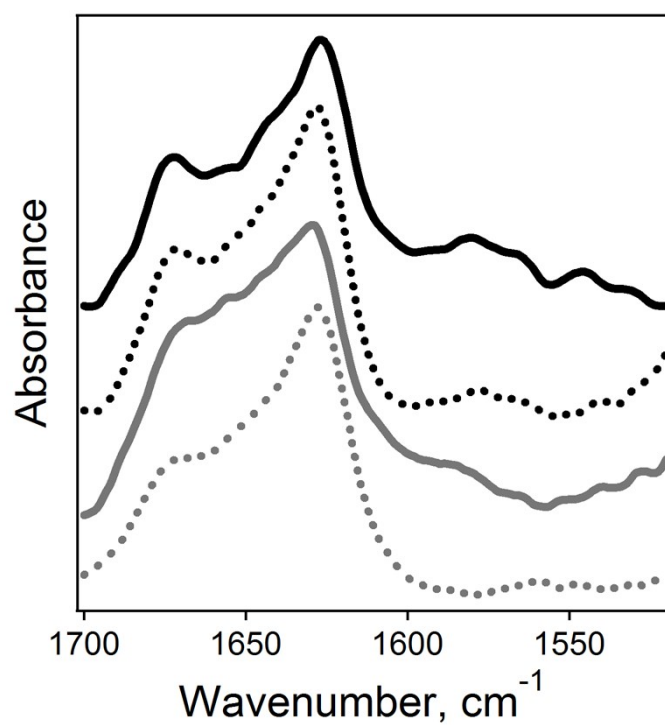

Figure S2. FTIR spectra of A $\beta$ <sub>1-42</sub> (solid) and A $\beta$ <sub>pE3-42</sub> (dotted) incubated in D<sub>2</sub>O-based 50 mM NaCl + 50 mM Na,K-phosphate, pD 7.2 (black lines) or 10 mM Na,K-phosphate, pD 7.2 (gray lines) for 2 hours. Total peptide concentration is 50  $\mu$ M. Comparison with the spectra of dry samples (Figure 2 of main text) indicates nearly complete loss of amide II bands, implying amide H/D exchange is close to completion.

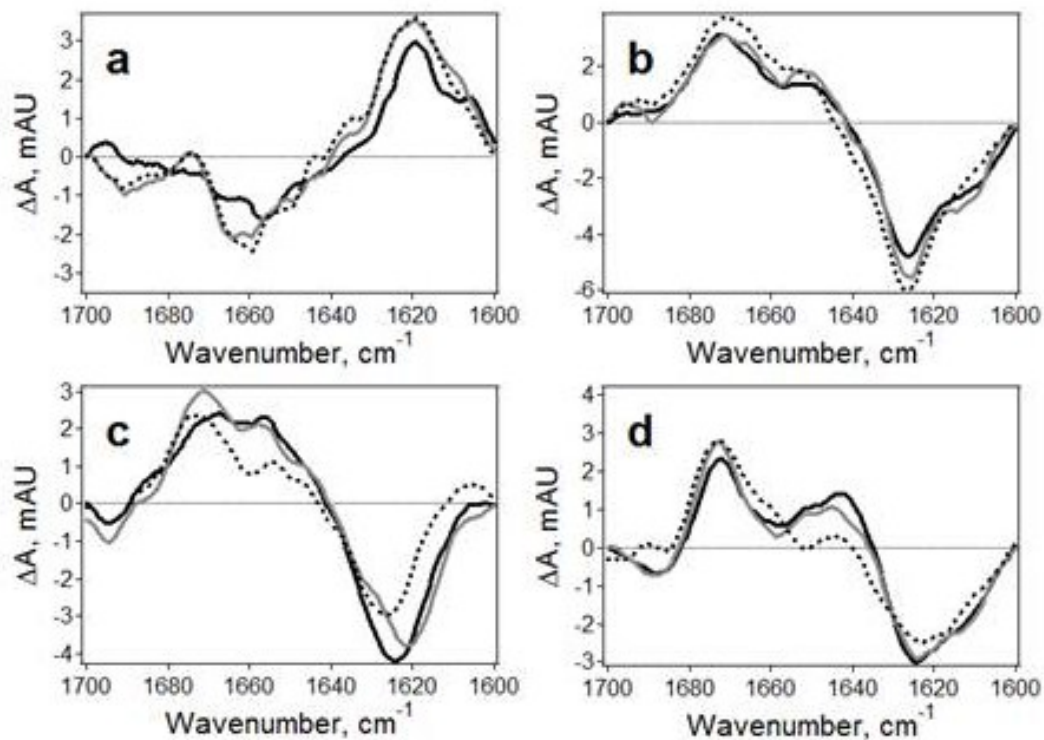

Figure S3. Difference FTIR spectra of  $A\beta_{1-42}$  and  $A\beta_{pE_{3-42}}$  peptides and their equimolar combinations in 50 mM NaCl + 50 mM Na,K-phosphate buffer (a, b) and 10 mM Na,K-phosphate buffer (c, d), pH 7.2 (buffers were made using  $D_2O$ ). Spectra in a) and c) show the difference  $A\beta_{1-42} - A\beta_{pE_{3-42}}$ , and those in b) and d) show the difference between 1:1 combination and the normalized sum of the spectra of the two peptides. Black, gray, and dashed lines correspond to the peptide samples incubated in a  $D_2O$ -based buffer for 10, 60 and 120 min, respectively. Total peptide concentration is 50  $\mu M$ .

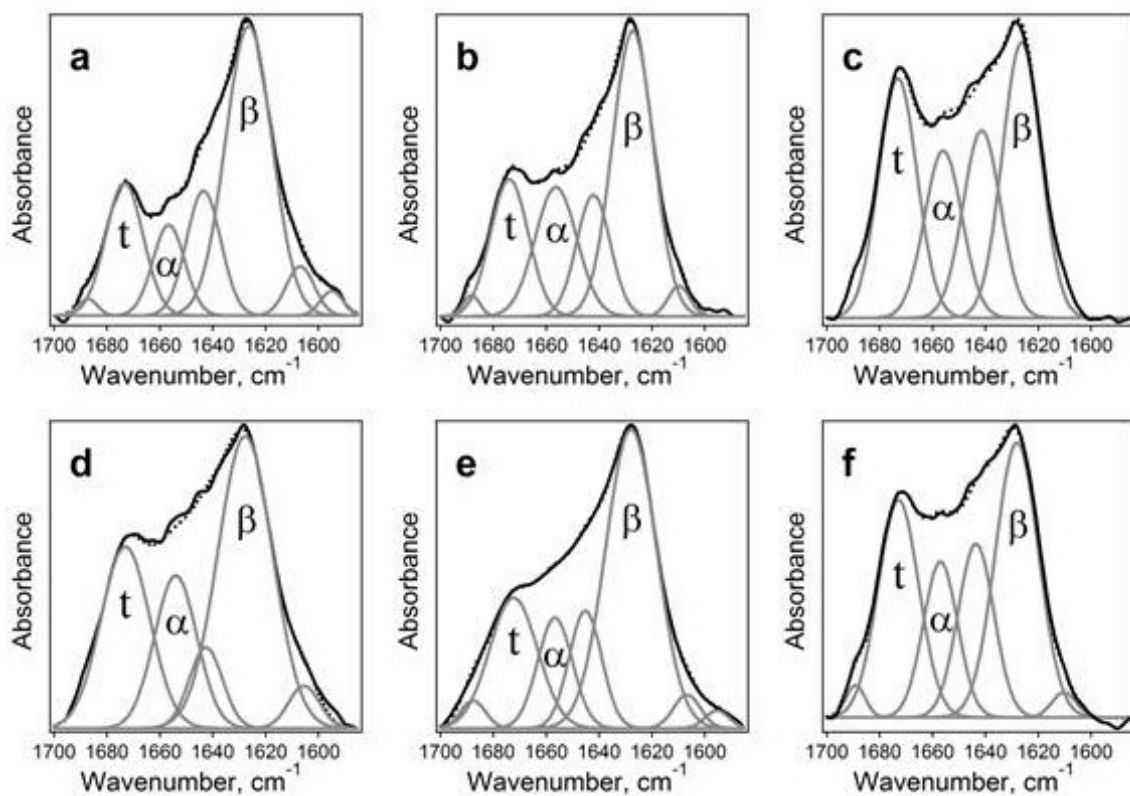

Figure S4. Curve-fitted FTIR spectra of unlabeled A $\beta$ <sub>1-42</sub> (a, d), A $\beta$ <sub>pE<sub>3-42</sub></sub> (b, e), and their 1:1 combination (c, f) incubated in 50 mM NaCl + 50 mM Na,K-phosphate buffer (a, b, c) or 10 mM Na,K-phosphate buffer (d, e, f), pD 7.2, for 2 hours. Total peptide concentration is 50  $\mu$ M. The measured spectra are shown in black solid lines, the amide I components in gray lines, and the curvefit, i.e. the sum of all components, in dotted lines. Components marked t,  $\alpha$ , and  $\beta$  are assigned to turn,  $\alpha$ -helix, and  $\beta$ -sheet structures, respectively.

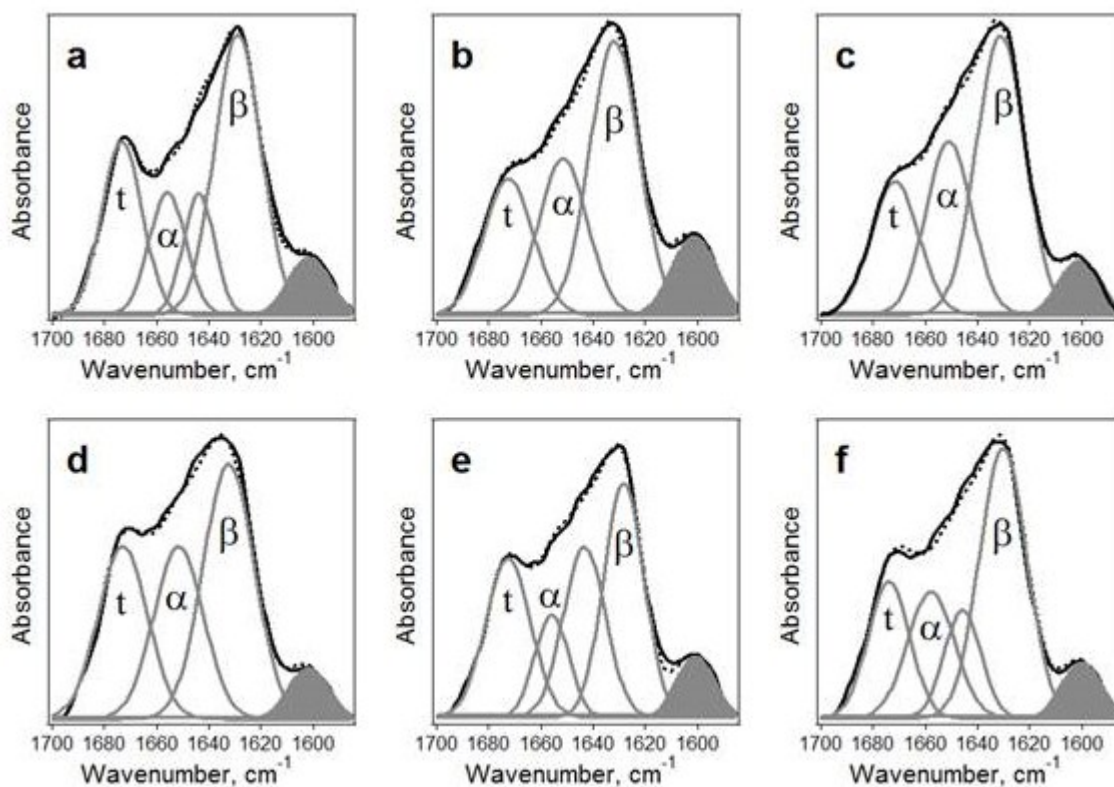

Figure S5. Curve-fitted FTIR spectra of K<sup>16</sup>L<sup>17</sup>V<sup>18</sup>-labeled A $\beta$ <sub>1-42</sub> (a, d), A $\beta$ pE<sub>3-42</sub> (b, e), and their 1:1 combination (c, f) incubated in 50 mM NaCl + 50 mM Na,K-phosphate buffer (a, b, c) or 10 mM Na,K-phosphate buffer (d, e, f), pD 7.2, for 2 hours. Total peptide concentration is 50  $\mu$ M. The measured spectra are shown in black solid lines, the amide I components in gray lines, and the curvefit, i.e. the sum of all components, in dotted lines. The component generated by the <sup>13</sup>C,<sup>15</sup>N-labeled segment is shaded. Components marked t,  $\alpha$ , and  $\beta$  are assigned to turn,  $\alpha$ -helix, and  $\beta$ -sheet structures, respectively.
